# Supplementary material for: Morphological Strategies in Ant Communities along Elevational Gradients in Three Mountain Ranges
Source: MDPI journal article supplement (doi:10.3390/d16010048), 2024-01-12
Supplement: s1 [file s1]

**Table S1:** Locations and conditions of sampling sites. Abbreviations are: MAT = Mean Annual Temperature, MAP = Mean Annual Precipitation, and UVB = Mean UVB of the highest month.

| Mountain Range    | Peak         | Transect  | Latitude | Longitude | Elevation | MAT (°C) | MAP (mm) | UVB (mW.cm <sup>-2</sup> ) |
|-------------------|--------------|-----------|----------|-----------|-----------|----------|----------|----------------------------|
| MacDonnell Ranges | Mt Razorback | MR-400-1  | -24.5887 | 133.2921  | 400       | 21.5     | 238      | 7472                       |
| MacDonnell Ranges | Mt Razorback | MR-400-2  | -24.5896 | 133.2931  | 400       | 21.5     | 238      | 7473                       |
| MacDonnell Ranges | Mt Razorback | MR-400-3  | -24.5921 | 133.2936  | 400       | 21.5     | 237      | 7473                       |
| MacDonnell Ranges | Mt Razorback | MR-400-4  | -24.5936 | 133.2924  | 400       | 21.5     | 237      | 7472                       |
| MacDonnell Ranges | Mt Razorback | MR-600-1  | -23.9411 | 132.9670  | 600       | 20.9     | 275      | 7338                       |
| MacDonnell Ranges | Mt Razorback | MR-600-2  | -23.9408 | 132.9684  | 600       | 20.9     | 275      | 7339                       |
| MacDonnell Ranges | Mt Razorback | MR-800-1  | -23.5696 | 132.5068  | 800       | 20.4     | 323      | 7320                       |
| MacDonnell Ranges | Mt Razorback | MR-800-2  | -23.5704 | 132.5070  | 800       | 20.4     | 323      | 7321                       |
| MacDonnell Ranges | Mt Razorback | MR-1000-1 | -23.5281 | 132.4492  | 1000      | 19.5     | 361      | 7356                       |
| MacDonnell Ranges | Mt Razorback | MR-1000-2 | -23.5290 | 132.4504  | 1000      | 19.3     | 366      | 7354                       |
| MacDonnell Ranges | Mt Razorback | MR-1200-1 | -23.5240 | 132.4477  | 1200      | 18.6     | 398      | 7356                       |
| MacDonnell Ranges | Mt Razorback | MR-1200-2 | -23.5240 | 132.4484  | 1200      | 18.6     | 398      | 7356                       |
| MacDonnell Ranges | Mt Sonder    | MS-400-1  | -24.2876 | 134.2308  | 400       | 21.5     | 231      | 7465                       |
| MacDonnell Ranges | Mt Sonder    | MS-400-2  | -24.2883 | 134.2319  | 400       | 21.5     | 231      | 7465                       |
| MacDonnell Ranges | Mt Sonder    | MS-400-3  | -24.2887 | 134.2332  | 400       | 21.5     | 231      | 7466                       |
| MacDonnell Ranges | Mt Sonder    | MS-400-4  | -24.2890 | 134.2346  | 400       | 21.4     | 231      | 7466                       |
| MacDonnell Ranges | Mt Sonder    | MS-600-1  | -23.7036 | 133.7795  | 600       | 20.7     | 292      | 7333                       |
| MacDonnell Ranges | Mt Sonder    | MS-600-2  | -23.7032 | 133.7806  | 600       | 20.7     | 292      | 7332                       |
| MacDonnell Ranges | Mt Sonder    | MS-600-3  | -23.7029 | 133.7818  | 600       | 20.7     | 292      | 7332                       |
| MacDonnell Ranges | Mt Sonder    | MS-600-4  | -23.7021 | 133.7829  | 600       | 20.7     | 292      | 7332                       |
| MacDonnell Ranges | Mt Sonder    | MS-800-1  | -23.5689 | 132.5259  | 800       | 20.2     | 333      | 7308                       |
| MacDonnell Ranges | Mt Sonder    | MS-800-2  | -23.5699 | 132.5264  | 800       | 20.2     | 333      | 7308                       |
| MacDonnell Ranges | Mt Sonder    | MS-800-3  | -23.5700 | 132.5270  | 800       | 20.2     | 333      | 7308                       |
| MacDonnell Ranges | Mt Sonder    | MS-800-4  | -23.5701 | 132.5275  | 800       | 20.2     | 333      | 7306                       |
| MacDonnell Ranges | Mt Sonder    | MS-1000-1 | -23.5739 | 132.5422  | 1000      | 20.2     | 332      | 7299                       |
| MacDonnell Ranges | Mt Sonder    | MS-1000-2 | -23.5730 | 132.5413  | 1000      | 20.1     | 333      | 7299                       |
| MacDonnell Ranges | Mt Sonder    | MS-1000-3 | -23.5725 | 132.5399  | 1000      | 20.1     | 333      | 7300                       |
| MacDonnell Ranges | Mt Sonder    | MS-1000-4 | -23.5722 | 132.5386  | 1000      | 20.1     | 333      | 7300                       |
| MacDonnell Ranges | Mt Sonder    | MS-1200-1 | -23.5786 | 132.5706  | 1200      | 18.4     | 396      | 7281                       |
| MacDonnell Ranges | Mt Sonder    | MS-1200-2 | -23.5787 | 132.5693  | 1200      | 18.4     | 396      | 7282                       |
| MacDonnell Ranges | Mt Sonder    | MS-1200-3 | -23.5782 | 132.5684  | 1200      | 18.4     | 396      | 7282                       |
| MacDonnell Ranges | Mt Sonder    | MS-1200-4 | -23.5780 | 132.5672  | 1200      | 18.4     | 396      | 7284                       |
| MacDonnell Ranges | Mt Zeil      | MZ-600-1  | -23.2628 | 132.4535  | 600       | 21.7     | 293      | 7293                       |
| MacDonnell Ranges | Mt Zeil      | MZ-600-2  | -23.2627 | 132.4521  | 600       | 21.7     | 293      | 7295                       |
| MacDonnell Ranges | Mt Zeil      | MZ-600-3  | -23.2629 | 132.4508  | 600       | 21.7     | 293      | 7295                       |
| MacDonnell Ranges | Mt Zeil      | MZ-600-4  | -23.2643 | 132.4507  | 600       | 21.7     | 293      | 7295                       |
| MacDonnell Ranges | Mt Zeil      | MZ-800-1  | -23.3770 | 132.3375  | 800       | 19.6     | 368      | 7405                       |
| MacDonnell Ranges | Mt Zeil      | MZ-800-2  | -23.3771 | 132.3363  | 800       | 19.6     | 368      | 7404                       |
| MacDonnell Ranges | Mt Zeil      | MZ-800-3  | -23.3779 | 132.3354  | 800       | 19.6     | 368      | 7404                       |
| MacDonnell Ranges | Mt Zeil      | MZ-800-4  | -23.3779 | 132.3349  | 800       | 19.6     | 368      | 7403                       |
| MacDonnell Ranges | Mt Zeil      | MZ-1000-1 | -23.3821 | 132.3451  | 1000      | 19.8     | 357      | 7407                       |
| MacDonnell Ranges | Mt Zeil      | MZ-1000-2 | -23.3821 | 132.3439  | 1000      | 19.8     | 357      | 7407                       |
| MacDonnell Ranges | Mt Zeil      | MZ-1000-3 | -23.3824 | 132.3425  | 1000      | 19.8     | 357      | 7407                       |
| MacDonnell Ranges | Mt Zeil      | MZ-1000-4 | -23.3825 | 132.3412  | 1000      | 19.6     | 368      | 7406                       |
| MacDonnell Ranges | Mt Zeil      | MZ-1200-1 | -23.3866 | 132.3679  | 1200      | 18.6     | 406      | 7415                       |
| MacDonnell Ranges | Mt Zeil      | MZ-1200-2 | -23.3874 | 132.3668  | 1200      | 18.6     | 406      | 7415                       |
| MacDonnell Ranges | Mt Zeil      | MZ-1200-3 | -23.3877 | 132.3656  | 1200      | 19       | 388      | 7414                       |

| Mountain Range    | Peak          | Transect  | Latitude | Longitude | Elevation | MAT (°C) | MAP (mm) | UVB (mW.cm <sup>-2</sup> ) |
|-------------------|---------------|-----------|----------|-----------|-----------|----------|----------|----------------------------|
| MacDonnell Ranges | Mt Zeil       | MZ-1200-4 | -23.3883 | 132.3644  | 1200      | 19       | 388      | 7413                       |
| MacDonnell Ranges | Mt Zeil       | MZ-1400-1 | -23.3940 | 132.3875  | 1400      | 17.9     | 432      | 7407                       |
| MacDonnell Ranges | Mt Zeil       | MZ-1400-2 | -23.3944 | 132.3867  | 1400      | 17.9     | 432      | 7407                       |
| MacDonnell Ranges | Mt Zeil       | MZ-1400-3 | -23.3948 | 132.3856  | 1400      | 17.9     | 432      | 7407                       |
| MacDonnell Ranges | Mt Zeil       | MZ-1400-4 | -23.3952 | 132.3866  | 1400      | 17.9     | 432      | 7407                       |
| Snowy Mountains   | Back Perisher | BP-400-1  | -36.7169 | 148.4204  | 400       | 12.8     | 800      | 6434                       |
| Snowy Mountains   | Back Perisher | BP-400-2  | -36.7175 | 148.4210  | 400       | 12.8     | 800      | 6434                       |
| Snowy Mountains   | Back Perisher | BP-400-3  | -36.7192 | 148.4229  | 400       | 12.8     | 800      | 6429                       |
| Snowy Mountains   | Back Perisher | BP-400-4  | -36.7206 | 148.4239  | 400       | 12.8     | 800      | 6427                       |
| Snowy Mountains   | Back Perisher | BP-600-1  | -36.6973 | 148.4326  | 600       | 11.5     | 845      | 6432                       |
| Snowy Mountains   | Back Perisher | BP-600-2  | -36.6975 | 148.4314  | 600       | 11.5     | 845      | 6433                       |
| Snowy Mountains   | Back Perisher | BP-600-3  | -36.6984 | 148.4303  | 600       | 11.5     | 845      | 6433                       |
| Snowy Mountains   | Back Perisher | BP-600-4  | -36.6998 | 148.4303  | 600       | 11.5     | 845      | 6433                       |
| Snowy Mountains   | Back Perisher | BP-800-1  | -36.7005 | 148.4504  | 800       | 11       | 871      | 6406                       |
| Snowy Mountains   | Back Perisher | BP-800-2  | -36.7010 | 148.4492  | 800       | 10.9     | 881      | 6409                       |
| Snowy Mountains   | Back Perisher | BP-800-3  | -36.7015 | 148.4478  | 800       | 10.9     | 881      | 6409                       |
| Snowy Mountains   | Back Perisher | BP-800-4  | -36.7032 | 148.4480  | 800       | 10.9     | 881      | 6407                       |
| Snowy Mountains   | Back Perisher | BP-1000-1 | -36.3500 | 148.5905  | 1000      | 9.8      | 939      | 6469                       |
| Snowy Mountains   | Back Perisher | BP-1000-2 | -36.3493 | 148.5908  | 1000      | 9.7      | 966      | 6469                       |
| Snowy Mountains   | Back Perisher | BP-1000-3 | -36.3483 | 148.5904  | 1000      | 9.7      | 966      | 6469                       |
| Snowy Mountains   | Back Perisher | BP-1000-4 | -36.3474 | 148.5893  | 1000      | 9.7      | 966      | 6471                       |
| Snowy Mountains   | Back Perisher | BP-1200-1 | -36.3469 | 148.5659  | 1200      | 8.5      | 1302     | 6482                       |
| Snowy Mountains   | Back Perisher | BP-1200-2 | -36.3463 | 148.5664  | 1200      | 8.5      | 1302     | 6482                       |
| Snowy Mountains   | Back Perisher | BP-1200-3 | -36.3449 | 148.5663  | 1200      | 8.5      | 1302     | 6482                       |
| Snowy Mountains   | Back Perisher | BP-1200-4 | -36.3436 | 148.5662  | 1200      | 8.5      | 1302     | 6482                       |
| Snowy Mountains   | Back Perisher | BP-1400-1 | -36.3451 | 148.5382  | 1400      | 7.5      | 1582     | 6495                       |
| Snowy Mountains   | Back Perisher | BP-1400-2 | -36.3444 | 148.5385  | 1400      | 7.5      | 1582     | 6495                       |
| Snowy Mountains   | Back Perisher | BP-1400-3 | -36.3440 | 148.5360  | 1400      | 7.5      | 1582     | 6497                       |
| Snowy Mountains   | Back Perisher | BP-1400-4 | -36.3446 | 148.5346  | 1400      | 7.5      | 1582     | 6498                       |
| Snowy Mountains   | Back Perisher | BP-1600-1 | -36.3813 | 148.4592  | 1600      | 6.2      | 1815     | 6522                       |
| Snowy Mountains   | Back Perisher | BP-1600-2 | -36.3806 | 148.4588  | 1600      | 6.2      | 1815     | 6522                       |
| Snowy Mountains   | Back Perisher | BP-1600-3 | -36.3794 | 148.4577  | 1600      | 6.3      | 1806     | 6522                       |
| Snowy Mountains   | Back Perisher | BP-1600-4 | -36.3782 | 148.4567  | 1600      | 6.3      | 1806     | 6523                       |
| Snowy Mountains   | Back Perisher | BP-1800-1 | -36.3858 | 148.4005  | 1800      | 5.4      | 1878     | 6548                       |
| Snowy Mountains   | Back Perisher | BP-1800-3 | -36.3848 | 148.4002  | 1800      | 5.4      | 1878     | 6548                       |
| Snowy Mountains   | Back Perisher | BP-1800-4 | -36.3840 | 148.4007  | 1800      | 5.4      | 1878     | 6548                       |
| Snowy Mountains   | Back Perisher | BP-2000-1 | -36.4018 | 148.3930  | 2000      | 4.7      | 1766     | 6550                       |
| Snowy Mountains   | Back Perisher | BP-2000-2 | -36.4012 | 148.3927  | 2000      | 4.7      | 1766     | 6550                       |
| Snowy Mountains   | Back Perisher | BP-2000-3 | -36.4008 | 148.3926  | 2000      | 4.7      | 1766     | 6550                       |
| Snowy Mountains   | Back Perisher | BP-2000-4 | -36.4000 | 148.3922  | 2000      | 4.7      | 1766     | 6551                       |
| Snowy Mountains   | Grey Mare     | GM-400-1  | -36.2202 | 148.1587  | 400       | 13.2     | 954      | 6598                       |
| Snowy Mountains   | Grey Mare     | GM-400-2  | -36.2200 | 148.1576  | 400       | 13.7     | 958      | 6599                       |
| Snowy Mountains   | Grey Mare     | GM-400-3  | -36.2201 | 148.1562  | 400       | 13.7     | 958      | 6598                       |
| Snowy Mountains   | Grey Mare     | GM-400-4  | -36.2205 | 148.1545  | 400       | 13.7     | 958      | 6598                       |
| Snowy Mountains   | Grey Mare     | GM-600-1  | -36.2673 | 148.1992  | 600       | 11.6     | 1012     | 6591                       |
| Snowy Mountains   | Grey Mare     | GM-600-2  | -36.2668 | 148.1991  | 600       | 11.6     | 1012     | 6591                       |
| Snowy Mountains   | Grey Mare     | GM-600-3  | -36.2665 | 148.1989  | 600       | 11.3     | 1044     | 6591                       |
| Snowy Mountains   | Grey Mare     | GM-600-4  | -36.2665 | 148.1978  | 600       | 11.3     | 1044     | 6591                       |
| Snowy Mountains   | Grey Mare     | GM-800-1  | -36.2971 | 148.1664  | 800       | 11.4     | 1045     | 6581                       |
| Snowy Mountains   | Grey Mare     | GM-800-2  | -36.2977 | 148.1660  | 800       | 11.4     | 1045     | 6581                       |
| Snowy Mountains   | Grey Mare     | GM-800-3  | -36.2971 | 148.1648  | 800       | 11.4     | 1045     | 6581                       |

| Mountain Range  | Peak          | Transect  | Latitude | Longitude | Elevation | MAT (°C) | MAP (mm) | UVB (mW.cm <sup>-2</sup> ) |
|-----------------|---------------|-----------|----------|-----------|-----------|----------|----------|----------------------------|
| Snowy Mountains | Grey Mare     | GM-800-4  | -36.2972 | 148.1637  | 800       | 11.4     | 1045     | 6581                       |
| Snowy Mountains | Grey Mare     | GM-1000-1 | -36.3020 | 148.1813  | 1000      | 9.7      | 1289     | 6581                       |
| Snowy Mountains | Grey Mare     | GM-1000-2 | -36.3026 | 148.1803  | 1000      | 9.7      | 1289     | 6580                       |
| Snowy Mountains | Grey Mare     | GM-1000-3 | -36.3032 | 148.1796  | 1000      | 9.7      | 1289     | 6580                       |
| Snowy Mountains | Grey Mare     | GM-1000-4 | -36.3034 | 148.1779  | 1000      | 9.7      | 1289     | 6580                       |
| Snowy Mountains | Grey Mare     | GM-1200-1 | -36.2625 | 148.2507  | 1200      | 9.3      | 1364     | 6596                       |
| Snowy Mountains | Grey Mare     | GM-1200-2 | -36.2619 | 148.2513  | 1200      | 9.3      | 1364     | 6596                       |
| Snowy Mountains | Grey Mare     | GM-1200-3 | -36.2607 | 148.2510  | 1200      | 9.3      | 1364     | 6596                       |
| Snowy Mountains | Grey Mare     | GM-1200-4 | -36.2608 | 148.2494  | 1200      | 8.2      | 1643     | 6596                       |
| Snowy Mountains | Grey Mare     | GM-1400-1 | -36.2769 | 148.2639  | 1400      | 7.8      | 1721     | 6593                       |
| Snowy Mountains | Grey Mare     | GM-1400-2 | -36.2772 | 148.2644  | 1400      | 7.8      | 1721     | 6593                       |
| Snowy Mountains | Grey Mare     | GM-1400-3 | -36.2781 | 148.2650  | 1400      | 7.8      | 1721     | 6592                       |
| Snowy Mountains | Grey Mare     | GM-1400-4 | -36.2783 | 148.2654  | 1400      | 7.8      | 1721     | 6592                       |
| Snowy Mountains | Grey Mare     | GM-1600-1 | -36.2816 | 148.2727  | 1600      | 6.7      | 1842     | 6592                       |
| Snowy Mountains | Grey Mare     | GM-1600-2 | -36.2820 | 148.2729  | 1600      | 6.7      | 1842     | 6592                       |
| Snowy Mountains | Grey Mare     | GM-1600-3 | -36.2828 | 148.2734  | 1600      | 6.7      | 1842     | 6591                       |
| Snowy Mountains | Grey Mare     | GM-1600-4 | -36.2836 | 148.2740  | 1600      | 6.5      | 1850     | 6591                       |
| Snowy Mountains | Grey Mare     | GM-1800-1 | -36.2589 | 148.2857  | 1800      | 5.4      | 1837     | 6600                       |
| Snowy Mountains | Grey Mare     | GM-1800-2 | -36.2599 | 148.2871  | 1800      | 5.4      | 1837     | 6600                       |
| Snowy Mountains | Grey Mare     | GM-1800-3 | -36.2597 | 148.2882  | 1800      | 5.4      | 1837     | 6600                       |
| Snowy Mountains | Grey Mare     | GM-1800-4 | -36.2588 | 148.2894  | 1800      | 5.4      | 1837     | 6600                       |
| Snowy Mountains | Mt Franklin   | MF-400-1  | -35.1136 | 148.6665  | 400       | 13.7     | 867      | 6669                       |
| Snowy Mountains | Mt Franklin   | MF-400-2  | -35.1127 | 148.6659  | 400       | 13.7     | 867      | 6669                       |
| Snowy Mountains | Mt Franklin   | MF-600-1  | -35.1194 | 148.6614  | 600       | 13.1     | 940      | 6668                       |
| Snowy Mountains | Mt Franklin   | MF-600-2  | -35.1197 | 148.6605  | 600       | 13.1     | 940      | 6668                       |
| Snowy Mountains | Mt Franklin   | MF-800-1  | -35.1765 | 148.8028  | 800       | 11.5     | 1036     | 6602                       |
| Snowy Mountains | Mt Franklin   | MF-800-2  | -35.1776 | 148.8025  | 800       | 11.5     | 1036     | 6600                       |
| Snowy Mountains | Mt Franklin   | MF-1000-1 | -35.2134 | 148.8357  | 1000      | 10.9     | 1071     | 6559                       |
| Snowy Mountains | Mt Franklin   | MF-1000-2 | -35.2130 | 148.8351  | 1000      | 10.9     | 1071     | 6559                       |
| Snowy Mountains | Mt Franklin   | MF-1200-1 | -35.2278 | 148.8280  | 1200      | 9.6      | 1174     | 6549                       |
| Snowy Mountains | Mt Franklin   | MF-1200-2 | -35.2270 | 148.8280  | 1200      | 9.6      | 1174     | 6551                       |
| Snowy Mountains | Mt Franklin   | MF-1400-1 | -35.4357 | 148.7810  | 1400      | 8.2      | 1306     | 6460                       |
| Snowy Mountains | Mt Franklin   | MF-1400-2 | -35.4359 | 148.7789  | 1400      | 8.2      | 1306     | 6462                       |
| Snowy Mountains | Mt Franklin   | MF-1600-1 | -35.5134 | 148.7607  | 1600      | 6.6      | 1499     | 6472                       |
| Snowy Mountains | Mt Franklin   | MF-1600-2 | -35.5145 | 148.7604  | 1600      | 6.6      | 1499     | 6472                       |
| Snowy Mountains | Mt Kosciuszko | MK-400-1  | -36.3495 | 148.1718  | 400       | 13.1     | 938      | 6569                       |
| Snowy Mountains | Mt Kosciuszko | MK-400-2  | -36.3487 | 148.1723  | 400       | 13.1     | 938      | 6569                       |
| Snowy Mountains | Mt Kosciuszko | MK-600-1  | -36.3719 | 148.1902  | 600       | 12.4     | 952      | 6564                       |
| Snowy Mountains | Mt Kosciuszko | MK-600-2  | -36.3713 | 148.1886  | 600       | 12.4     | 952      | 6564                       |
| Snowy Mountains | Mt Kosciuszko | MK-800-1  | -36.4521 | 148.1608  | 800       | 10.8     | 1084     | 6541                       |
| Snowy Mountains | Mt Kosciuszko | MK-800-2  | -36.4532 | 148.1611  | 800       | 10.8     | 1084     | 6540                       |
| Snowy Mountains | Mt Kosciuszko | MK-1000-1 | -36.5249 | 148.1933  | 1000      | 9.1      | 1338     | 6524                       |
| Snowy Mountains | Mt Kosciuszko | MK-1000-2 | -36.5235 | 148.1930  | 1000      | 9.1      | 1338     | 6524                       |
| Snowy Mountains | Mt Kosciuszko | MK-1200-1 | -36.5305 | 148.1989  | 1200      | 8.6      | 1446     | 6523                       |
| Snowy Mountains | Mt Kosciuszko | MK-1200-2 | -36.5301 | 148.2001  | 1200      | 7.9      | 1591     | 6524                       |
| Snowy Mountains | Mt Kosciuszko | MK-1400-1 | -36.4943 | 148.3182  | 1400      | 7.6      | 1719     | 6547                       |
| Snowy Mountains | Mt Kosciuszko | MK-1400-2 | -36.4944 | 148.3189  | 1400      | 7.6      | 1719     | 6547                       |
| Snowy Mountains | Mt Kosciuszko | MK-1600-1 | -36.4977 | 148.2994  | 1600      | 5.8      | 1801     | 6544                       |
| Snowy Mountains | Mt Kosciuszko | MK-1600-2 | -36.4975 | 148.2990  | 1600      | 5.8      | 1801     | 6545                       |
| Snowy Mountains | Mt Kosciuszko | MK-1800-1 | -36.4928 | 148.2926  | 1800      | 5.8      | 1801     | 6544                       |
| Snowy Mountains | Mt Kosciuszko | MK-1800-2 | -36.4926 | 148.2924  | 1800      | 5.8      | 1801     | 6544                       |

| Mountain Range  | Peak               | Transect   | Latitude | Longitude | Elevation | MAT (°C) | MAP (mm) | UVB (mW.cm <sup>-2</sup> ) |
|-----------------|--------------------|------------|----------|-----------|-----------|----------|----------|----------------------------|
| Snowy Mountains | Mt Kosciuszko      | MK-2000-1  | -36.4849 | 148.2818  | 2000      | 3.8      | 1672     | 6544                       |
| Snowy Mountains | Mt Kosciuszko      | MK-2000-2  | -36.4849 | 148.2818  | 2000      | 3.8      | 1672     | 6544                       |
| Snowy Mountains | Mt Nattung         | NA-400-1   | -35.5646 | 148.3318  | 400       | 13.4     | 1018     | 6579                       |
| Snowy Mountains | Mt Nattung         | NA-400-2   | -35.5651 | 148.3327  | 400       | 13.4     | 1018     | 6575                       |
| Snowy Mountains | Mt Nattung         | NA-600-1   | -35.5796 | 148.3188  | 600       | 13       | 1053     | 6582                       |
| Snowy Mountains | Mt Nattung         | NA-600-2   | -35.5808 | 148.3181  | 600       | 13       | 1053     | 6580                       |
| Snowy Mountains | Mt Nattung         | NA-800-1   | -35.5809 | 148.3365  | 800       | 12.7     | 1092     | 6564                       |
| Snowy Mountains | Mt Nattung         | NA-800-2   | -35.5804 | 148.3353  | 800       | 12.7     | 1092     | 6564                       |
| Snowy Mountains | Mt Nattung         | NA-1000-1  | -35.5953 | 148.3573  | 1000      | 10.6     | 1271     | 6537                       |
| Snowy Mountains | Mt Nattung         | NA-1000-2  | -35.5948 | 148.3546  | 1000      | 10.6     | 1271     | 6541                       |
| Snowy Mountains | Mt Nattung         | NA-1200-1  | -35.6414 | 148.3884  | 1200      | 9.3      | 1363     | 6515                       |
| Snowy Mountains | Mt Nattung         | NA-1200-2  | -35.6414 | 148.3864  | 1200      | 9.3      | 1363     | 6515                       |
| Snowy Mountains | Mt Nattung         | NA-1400-1  | -35.6995 | 148.6111  | 1400      | 7.9      | 1383     | 6495                       |
| Snowy Mountains | Mt Nattung         | NA-1400-2  | -35.6996 | 148.6098  | 1400      | 7.9      | 1383     | 6496                       |
| Snowy Mountains | Mt Nattung         | NA-1600-1  | -35.7081 | 148.6072  | 1600      | 7.3      | 1480     | 6497                       |
| Snowy Mountains | Mt Nattung         | NA-1600-2  | -35.7078 | 148.6056  | 1600      | 7.3      | 1480     | 6497                       |
| Tasmania        | Ironstone Mountain | IM-400-1   | -41.6510 | 146.4850  | 400       | 9.8      | 1214     | 5837                       |
| Tasmania        | Ironstone Mountain | IM-400-2   | -41.6520 | 146.4870  | 400       | 9.8      | 1214     | 5837                       |
| Tasmania        | Ironstone Mountain | IM-600-1   | -41.6730 | 146.4730  | 600       | 8.8      | 1342     | 5839                       |
| Tasmania        | Ironstone Mountain | IM-600-2   | -41.6720 | 146.4780  | 600       | 9        | 1313     | 5839                       |
| Tasmania        | Ironstone Mountain | IM-800-1   | -41.6780 | 146.4710  | 800       | 7.6      | 1486     | 5839                       |
| Tasmania        | Ironstone Mountain | IM-800-2   | -41.6770 | 146.4720  | 800       | 7.6      | 1486     | 5839                       |
| Tasmania        | Ironstone Mountain | IM-1000-1  | -41.6860 | 146.4690  | 1000      | 6        | 1739     | 5840                       |
| Tasmania        | Ironstone Mountain | IM-1000-2  | -41.6882 | 146.4713  | 1000      | 6        | 1739     | 5841                       |
| Tasmania        | Ironstone Mountain | IM-1200-1  | -41.7050 | 146.4650  | 1200      | 5.2      | 1789     | 5843                       |
| Tasmania        | Ironstone Mountain | IM-1200-2  | -41.7050 | 146.4660  | 1200      | 5.2      | 1789     | 5843                       |
| Tasmania        | Ironstone Mountain | IM-1400-1  | -41.7120 | 146.4660  | 1400      | 5        | 1796     | 5843                       |
| Tasmania        | Ironstone Mountain | IM-1400-2  | -41.7130 | 146.4690  | 1400      | 4.2      | 1856     | 5844                       |
| Tasmania        | Legges Tor         | LT-400-1   | -41.5120 | 147.7620  | 400       | 10.4     | 881      | 5716                       |
| Tasmania        | Legges Tor         | LT-400-2   | -41.5090 | 147.7640  | 400       | 10.4     | 881      | 5715                       |
| Tasmania        | Legges Tor         | LT-600-1   | -41.5160 | 147.7470  | 600       | 10       | 944      | 5720                       |
| Tasmania        | Legges Tor         | LT-600-2   | -41.5150 | 147.7450  | 600       | 10       | 944      | 5720                       |
| Tasmania        | Legges Tor         | LT-800-1   | -41.5230 | 147.7190  | 800       | 8.1      | 1273     | 5727                       |
| Tasmania        | Legges Tor         | LT-800-2   | -41.5210 | 147.7180  | 800       | 8.1      | 1273     | 5726                       |
| Tasmania        | Legges Tor         | LT-1000-1  | -41.5264 | 147.7063  | 1000      | 6.9      | 1418     | 5730                       |
| Tasmania        | Legges Tor         | LT-1000-2  | -41.5140 | 147.7010  | 1000      | 7.7      | 1351     | 5729                       |
| Tasmania        | Legges Tor         | LT-1200-1  | -41.5090 | 147.6380  | 1200      | 5.6      | 1533     | 5740                       |
| Tasmania        | Legges Tor         | LT-1200-2  | -41.5102 | 147.6247  | 1200      | 6.1      | 1496     | 5745                       |
| Tasmania        | Legges Tor         | LT-1400-1  | -41.5190 | 147.6630  | 1400      | 4.8      | 1594     | 5737                       |
| Tasmania        | Legges Tor         | LT-1400-2  | -41.5120 | 147.6590  | 1400      | 5        | 1592     | 5737                       |
| Tasmania        | Mount Field        | MFE-400-1  | -42.6770 | 146.7000  | 400       | 9.3      | 991      | 5383                       |
| Tasmania        | Mount Field        | MFE-400-2  | -42.6750 | 146.7040  | 400       | 9        | 992      | 5385                       |
| Tasmania        | Mount Field        | MFE-600-1  | -42.6800 | 146.6820  | 600       | 8.2      | 1114     | 5378                       |
| Tasmania        | Mount Field        | MFE-600-2  | -42.6840 | 146.6790  | 600       | 8.9      | 1067     | 5376                       |
| Tasmania        | Mount Field        | MFE-800-1  | -42.6800 | 146.6560  | 800       | 7.1      | 1246     | 5374                       |
| Tasmania        | Mount Field        | MFE-800-2  | -42.6770 | 146.6570  | 800       | 7.1      | 1246     | 5377                       |
| Tasmania        | Mount Field        | MFE-1000-1 | -42.6630 | 146.6540  | 1000      | 6.7      | 1275     | 5384                       |
| Tasmania        | Mount Field        | MFE-1000-2 | -42.6590 | 146.6550  | 1000      | 6.7      | 1275     | 5387                       |
| Tasmania        | Mount Field        | MFE-1200-1 | -42.6560 | 146.6480  | 1200      | 4.8      | 1406     | 5388                       |
| Tasmania        | Mount Field        | MFE-1200-2 | -42.6510 | 146.6490  | 1200      | 4.8      | 1406     | 5390                       |
| Tasmania        | Mount Mawson       | MM-400-1   | -42.7310 | 146.5800  | 400       | 9.3      | 1273     | 5330                       |

| Mountain Range | Peak          | Transect  | Latitude | Longitude | Elevation | MAT (°C) | MAP (mm) | UVB (mW.cm <sup>-2</sup> ) |
|----------------|---------------|-----------|----------|-----------|-----------|----------|----------|----------------------------|
| Tasmania       | Mount Mawson  | MM-400-2  | -42.7290 | 146.5820  | 400       | 9.3      | 1273     | 5332                       |
| Tasmania       | Mount Mawson  | MM-600-1  | -42.7170 | 146.5760  | 600       | 8.1      | 1335     | 5338                       |
| Tasmania       | Mount Mawson  | MM-600-2  | -42.7180 | 146.5780  | 600       | 8.1      | 1335     | 5337                       |
| Tasmania       | Mount Mawson  | MM-800-1  | -42.7070 | 146.5920  | 800       | 6.3      | 1428     | 5347                       |
| Tasmania       | Mount Mawson  | MM-800-2  | -42.7080 | 146.5950  | 800       | 6.3      | 1428     | 5347                       |
| Tasmania       | Mount Mawson  | MM-1000-1 | -42.7000 | 146.5920  | 1000      | 5.1      | 1490     | 5350                       |
| Tasmania       | Mount Mawson  | MM-1000-2 | -42.7000 | 146.5900  | 1000      | 4.5      | 1518     | 5350                       |
| Tasmania       | Mount Mawson  | MM-1200-1 | -42.6950 | 146.5900  | 1200      | 4.5      | 1518     | 5353                       |
| Tasmania       | Mount Mawson  | MM-1200-2 | -42.6960 | 146.5940  | 1200      | 5.1      | 1490     | 5353                       |
| Tasmania       | Stack's Bluff | SB-400-1  | -41.7300 | 147.6950  | 400       | 10.8     | 660      | 5764                       |
| Tasmania       | Stack's Bluff | SB-400-2  | -41.7240 | 147.6980  | 400       | 9.8      | 799      | 5760                       |
| Tasmania       | Stack's Bluff | SB-600-1  | -41.7260 | 147.6920  | 600       | 10.8     | 660      | 5765                       |
| Tasmania       | Stack's Bluff | SB-600-2  | -41.7230 | 147.6940  | 600       | 9.8      | 799      | 5763                       |
| Tasmania       | Stack's Bluff | SB-800-1  | -41.6320 | 147.7220  | 800       | 7.8      | 1221     | 5745                       |
| Tasmania       | Stack's Bluff | SB-800-2  | -41.6310 | 147.7280  | 800       | 8        | 1191     | 5742                       |
| Tasmania       | Stack's Bluff | SB-800-3  | -41.6300 | 147.7310  | 800       | 8        | 1191     | 5742                       |
| Tasmania       | Stack's Bluff | SB-1000-1 | -41.6240 | 147.7110  | 1000      | 6.2      | 1415     | 5747                       |
| Tasmania       | Stack's Bluff | SB-1000-2 | -41.6250 | 147.7100  | 1000      | 6.2      | 1415     | 5748                       |
| Tasmania       | Stack's Bluff | SB-1200-1 | -41.6230 | 147.7010  | 1200      | 5.9      | 1436     | 5750                       |
| Tasmania       | Stack's Bluff | SB-1200-2 | -41.6240 | 147.7000  | 1200      | 4.9      | 1526     | 5751                       |
| Tasmania       | Stack's Bluff | SB-1400-1 | -41.6220 | 147.6970  | 1400      | 4.9      | 1526     | 5751                       |
| Tasmania       | Stack's Bluff | SB-1400-2 | -41.6250 | 147.6950  | 1400      | 4.9      | 1526     | 5753                       |
| Tasmania       | Stack's Bluff | SB-1400-3 | -41.6170 | 147.6890  | 1400      | 4.6      | 1552     | 5752                       |
| Tasmania       | Stack's Bluff | SB-1400-4 | -41.6190 | 147.7000  | 1400      | 4.9      | 1526     | 5750                       |

**Table S2:** Eigenvalues and % variance explained by principal components and contribution of habitat characteristics and morphological traits to the primary and secondary principal components from PCA.

|                |                | Habitat     |              | Morphological traits |              |              |
|----------------|----------------|-------------|--------------|----------------------|--------------|--------------|
|                |                | PC1         | PC2          | PC1                  | PC2          |              |
| Eigenvalue     |                | 3.20        | 1.32         | 2.01                 | 1.33         |              |
| % Variance     |                | 40.0        | 16.5         | 28.7                 | 19.0         |              |
| Characteristic | % Total canopy | <b>0.51</b> | 0.11         | Head width           | -0.18        | <b>0.73</b>  |
|                | % Tree canopy  | <b>0.52</b> | 0.04         | Lightness            | -0.11        | <b>-0.82</b> |
|                | % Ground cover | -0.18       | <b>0.54</b>  | Mandible length      | -0.18        | -0.17        |
|                | % Grass        | -0.15       | <b>0.59</b>  | Femur length         | <b>0.64</b>  | 0.00         |
|                | % Litter       | <b>0.50</b> | -0.11        | Eye position         | <b>0.69</b>  | 0.14         |
|                | % Rock         | -0.26       | <b>-0.32</b> | Pilosity             | <b>-0.65</b> | -0.16        |
|                | % Bare         | -0.24       | <b>-0.46</b> | Sculpturing          | <b>-0.79</b> | -0.24        |
|                | % Moss         | 0.20        | -0.14        |                      |              |              |
